# Supplementary material
Source: Springer Nature journal article supplement (https://www.springermedizin.de/resource/supplementary/12879_2011_1908_MOESM5_ESM.pdf/9444004)

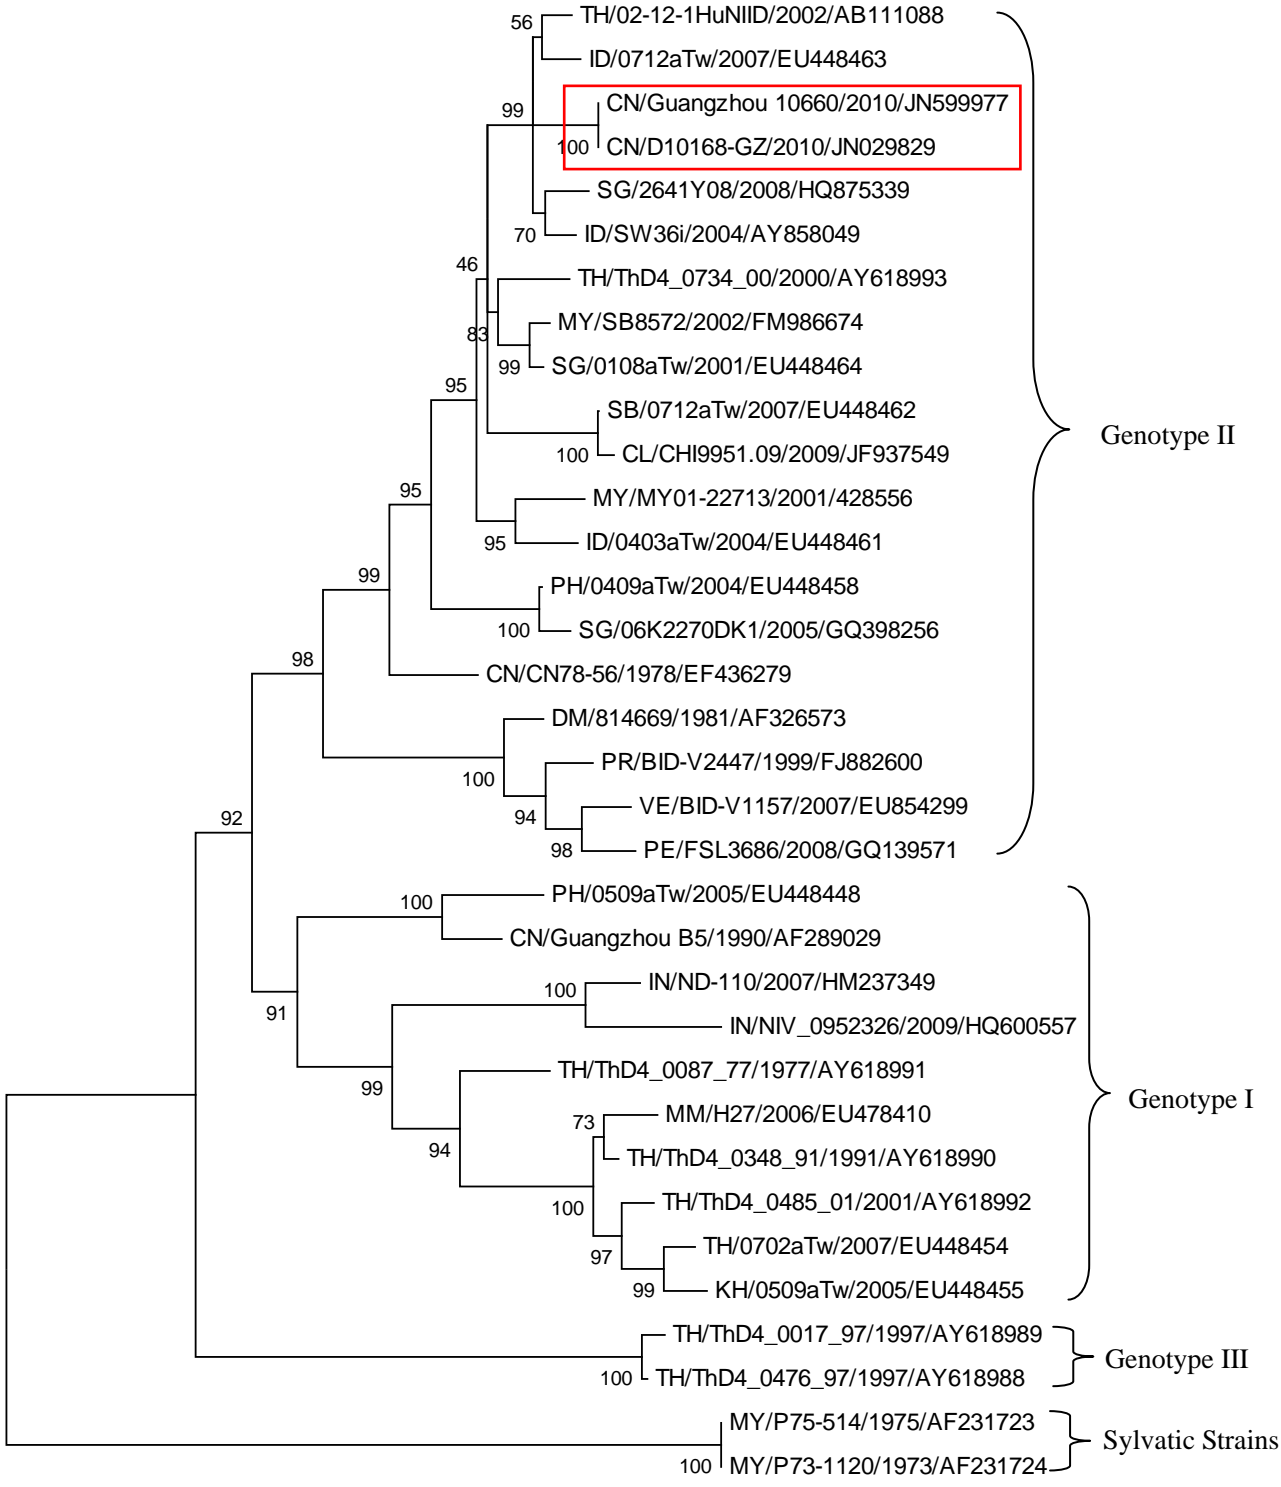

Supplement: MOESM5 [file 9444004]
